# Supplementary material for: Estimation of ice melt, freshwater budget, and their multi-decadal trends in the Baffin Bay and Labrador Sea
Source: Copernicus journal article supplement (doi:10.5194/egusphere-2023-2492), 2023-12-07
Supplement: Supplementary file 1 [file egusphere-2023-2492-supplement.pdf]

Supplementary Materials for

Estimation of ice melt, freshwater budget, and their multi-decadal trends in the Baffin Bay  
and Labrador Sea

Vigan Mensah\*, Koji Fujita, Stephen E. L. Howell, Miho Ikeda, Mizuki Komatsu, and Kay  
I. Ohshima

\*Corresponding author. Email:vmensah@lowtem.hokudai.ac.jp

This PDF file includes:

Table. S1

Table. S2

Table S1: Outputs of river runoff from the energy balance model for each individual basin around Baffin Bay and the Labrador Sea (see the basin limits in Fig. 4). NFL stands for Newfoundland and Labrador, BFN for Baffin Island, DVN for Devon Island, GNW for north-western Greenland, GCW for center-west Greenland, and GSW for southwestern Greenland.

| Components          | Freshwater volume<br>(km <sup>3</sup> ) | Freshwater volume<br>1965-1995 (km <sup>3</sup> ) | Freshwater volume<br>1996-2022 (km <sup>3</sup> ) |
|---------------------|-----------------------------------------|---------------------------------------------------|---------------------------------------------------|
| NFL                 | 300.7                                   | 298.7                                             | 303.1                                             |
| BFN                 | 95.2                                    | 93.2                                              | 97.6                                              |
| DVN                 | 2.7                                     | 2.6                                               | 2.8                                               |
| GNW                 | 7.7                                     | 7.4                                               | 8.1                                               |
| GCW                 | 8.6                                     | 8.2                                               | 9.1                                               |
| GSW                 | 42.8                                    | 42.8                                              | 42.7                                              |
| <b>Total runoff</b> | <b>457.7</b>                            | <b>452.9</b>                                      | <b>463.4</b>                                      |

Table S2: Outputs of glacier melt from the GLIMB model for each individual basin around Baffin Bay and the Labrador Sea (see the basin limits in Fig. 4)

| Components          | Freshwater volume<br>(km <sup>3</sup> ) | Freshwater volume<br>1965-1995 (km <sup>3</sup> ) | Freshwater volume<br>1996-2022 (km <sup>3</sup> ) |
|---------------------|-----------------------------------------|---------------------------------------------------|---------------------------------------------------|
| NFL                 | 0.1                                     | 0.1                                               | 0.1                                               |
| BFN                 | 53.3                                    | 40.9                                              | 67.6                                              |
| DVN                 | 28.9                                    | 19.5                                              | 39.6                                              |
| GNW                 | 94.2                                    | 64.8                                              | 128.0                                             |
| GCW                 | 77.7                                    | 66.7                                              | 90.0                                              |
| GSW                 | 173.6                                   | 155.8                                             | 194.0                                             |
| <b>Total runoff</b> | <b>427.8</b>                            | <b>347.8</b>                                      | <b>519.3</b>                                      |
